# Supplementary figures and images for: Rapid Biosynthesis of Gold Nanoparticles by the Extracellular Secretion ofBacillus niabensis45: Characterization and Antibiofilm Activity
Source: Hindawi journal article supplement (doi:10.1155/2016/2781347), 2016-01-01

## Supplementary materials

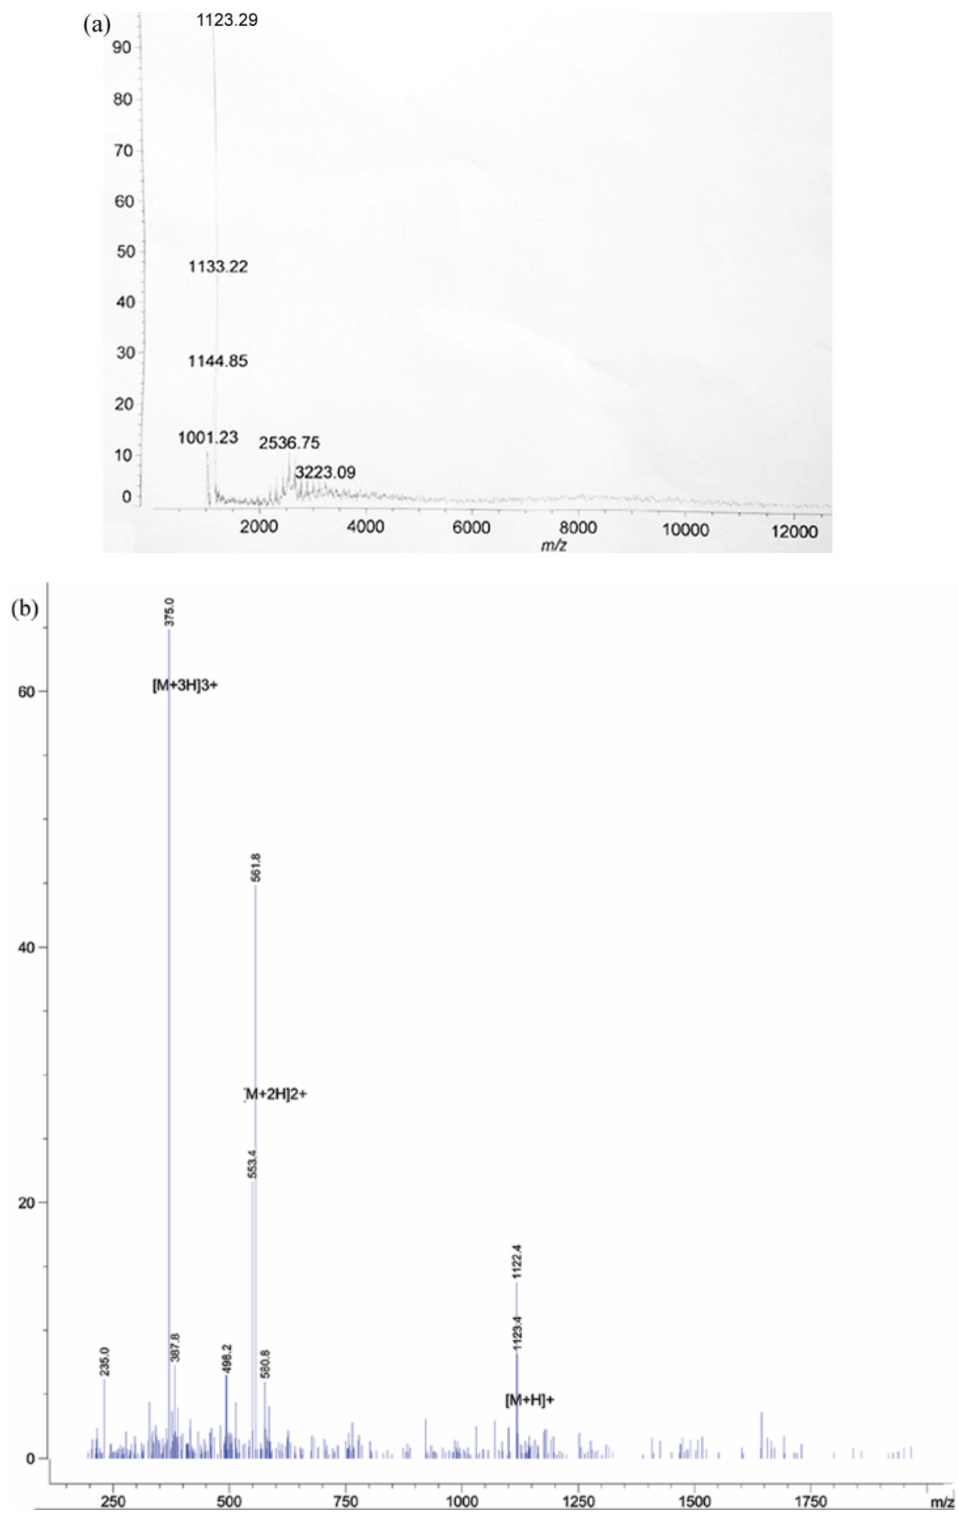

**Fig. S1** MALDI-TOF-MS (a) and ESI-MS (b) spectrum of the peptide P2

Supplement: f1 [file 2781347.f1.pdf]
